# Supplementary material
Source: HighWire-hosted journal article supplement (https://cmaj.ca/highwire/filestream/57706/field_highwire_adjunct_files/1/cost-telford-appendix_2.pdf)
Supplement: cost-telford-appendix_2.pdf [file cost-telford-appendix_2.pdf]

**Appendix 2 (as submitted by author). Input parameter estimates and standard deviations for model**

| Variable                                                        | Input parameter estimate | Standard deviation    | Source         |
|-----------------------------------------------------------------|--------------------------|-----------------------|----------------|
| Prevalence of low risk polyp at 50 years                        | 0.089                    | 0.009                 | W1-W5          |
| Prevalence of advanced adenoma at 50 years                      | 0.03                     | 0.003                 | W1-W5          |
| Prevalence of pre-clinical cancer at 50 years                   | 0.003                    | 0.0003                | W1-W5          |
| <b>Annual transition probabilities</b>                          |                          |                       |                |
| Low risk polyp from normal                                      | Age-dependent            | ± 10% input parameter | W1-W5          |
| Advanced adenoma from low risk polyp                            | 0.036                    | 0.011                 | W1-W5          |
| Localized cancer from advanced adenoma                          | 0.042                    | 0.013                 | W1-W5          |
| Regional cancer from localized cancer                           | 0.17                     | 0.052                 | W1,W5-W7       |
| Distant cancer from regional cancer                             | 0.10                     | 0.029                 | W1,W3,W5,W7,W8 |
| Diagnosed from pre-clinical localized cancer                    | 0.17                     | 0.050                 | W1,W5-W7       |
| Diagnosed from pre-clinical regional cancer                     | 0.21                     | 0.064                 | W1,W5-W7       |
| Diagnosed from pre-clinical distant cancer                      | 1                        | --                    | Assumption     |
| <b>Screening test performance</b>                               |                          |                       |                |
| <b>Low sensitivity guaiac fecal occult blood test</b>           |                          |                       |                |
| Sensitivity to detect a low risk polyp                          | 0.05                     | 0.02                  | W8-W11         |
| Sensitivity to detect an advanced adenoma                       | 0.19                     | 0.05                  | W8-W11         |
| Sensitivity to detect cancer                                    | 0.46                     | 0.31                  | W8-W11         |
| Specificity                                                     | 0.94                     | 0.05                  | W8-W11         |
| <b>High sensitivity guaiac fecal occult blood test</b>          |                          |                       |                |
| Sensitivity to detect a low risk polyp                          | 0.03                     | 0.04                  | W11,W12        |
| Sensitivity to detect an advanced adenoma                       | 0.34                     | 0.17                  | W11-W13        |
| Sensitivity to detect cancer                                    | 0.72                     | 0.32                  | W11-W13        |
| Specificity                                                     | 0.91                     | 0.17                  | W11-W13        |
| <b>Fecal immunochemical test</b>                                |                          |                       |                |
| Sensitivity to detect a low risk polyp                          | 0.10                     | 0.11                  | W11,W12,W14    |
| Sensitivity to detect an advanced adenoma                       | 0.46                     | 0.13                  | W11-W16        |
| Sensitivity to detect cancer                                    | 0.85                     | 0.10                  | W11-W16        |
| Specificity                                                     | 0.94                     | 0.26                  | W11-W15        |
| <b>Fecal DNA</b>                                                |                          |                       |                |
| Sensitivity to detect a low risk polyp                          | 0.08                     | 0.008                 | W10            |
| Sensitivity to detect an advanced adenoma                       | 0.45                     | 0.28                  | W17-W19        |
| Sensitivity to detect cancer                                    | 0.70                     | 0.12                  | W17-W19        |
| Specificity                                                     | 0.94                     | 0.06                  | W10,W18,W19    |
| <b>Double contrast barium enema</b>                             |                          |                       |                |
| Sensitivity to detect a low risk polyp                          | 0.35                     | 0.07                  | W20,W21        |
| Sensitivity to detect an advanced adenoma                       | 0.47                     | 0.03                  | W20,W21        |
| Sensitivity to detect cancer                                    | 0.86                     | 0.04                  | W20,W22        |
| Specificity                                                     | 0.82                     | 0.082                 | W20            |
| <b>Colonoscopy and sigmoidoscopy (distal only)</b>              |                          |                       |                |
| Probability of a negative sigmoidoscopy and a proximal neoplasm | 0.21                     | 0.10                  | W2             |
| Sensitivity to detect a low risk polyp                          | 0.92                     | 0.09                  | W22-W28        |
| Sensitivity to detect an advanced adenoma                       | 0.97                     | 0.05                  | W22-W29        |
| Sensitivity to detect cancer                                    | 0.93                     | 0.19                  | W22-W29        |
| Specificity                                                     | 1                        | -                     | W20, W23,W27   |

|                                                          |        |         |                                     |
|----------------------------------------------------------|--------|---------|-------------------------------------|
| <b>CT colonography</b>                                   |        |         |                                     |
| Sensitivity to detect a low risk polyp                   | 0.50   | 0.25    | W20,<br>W23,W24,W26,<br>W28,W30,W31 |
| Sensitivity to detect an advanced adenoma                | 0.78   | 0.19    | W20,W23,W24,<br>W26,W30,W31         |
| Sensitivity to detect cancer                             | 0.89   | 0.12    | W20,W23,W24,W<br>26,W28,W31         |
| Specificity                                              | 0.91   | 0.07    | W20,W23,W24,<br>W26,W28,W31         |
| <b>Compliance</b>                                        |        |         |                                     |
| Probability of undergoing each screening round           | 0.73   | 0.22    | W32-W35                             |
| Follow-up colonoscopy for a positive screening test      | 0.84   | 0.25    | W35-W37                             |
| <b>Serious complication</b>                              |        |         |                                     |
| Sigmoidoscopy                                            | 0.0002 | 0.00006 | W38                                 |
| Colonoscopy diagnostic                                   | 0.0008 | 0.0002  | W39                                 |
| Colonoscopy with polypectomy                             | 0.007  | 0.0021  | W39                                 |
| Double contrast barium enema                             | 0.0002 | 0.00006 | W40                                 |
| CT colonography                                          | 0.0001 | 0.00003 | W41                                 |
| Death from complication                                  | 0.012  | 0.0036  | W39                                 |
| <b>Relapse (annual)</b>                                  |        |         |                                     |
| Stage I                                                  | 0.01   | 0.003   | W42                                 |
| Stage II/III                                             | 0.04   | 0.012   | W43                                 |
| <b>Medical costs (2007 Canadian dollars)</b>             |        |         |                                     |
| Primary Care Physician Visit                             | 58     | 17      | W44                                 |
| Guaiac-based fecal occult blood test                     | 10     | 3       | W45                                 |
| Fecal immunochemical test                                | 25     | 7       | W46                                 |
| Fecal DNA                                                | 346    | 92      | W46                                 |
| Sigmoidoscopy                                            | 193    | 58      | W47,W48                             |
| Double contrast barium enema                             | 178    | 53      | W47                                 |
| Colonoscopy                                              | 424    | 128     | W47,W48                             |
| Polypectomy                                              | 185    | 56      | W47                                 |
| CT colonography                                          | 590    | 177     | W47                                 |
| Complication                                             | 31,193 | 9,358   | W49                                 |
| <b>Cost of colorectal cancer (2007 Canadian dollars)</b> |        |         |                                     |
| Stage I                                                  |        |         |                                     |
| Year 1                                                   | 13,734 | 4,120   | W50                                 |
| Year 2-5 (annual)                                        | 503    | 151     | W51                                 |
| Stage II                                                 |        |         |                                     |
| Year 1                                                   | 27,095 | 8,129   | W50                                 |
| Year 2-5 (annual)                                        | 857    | 257     | W51                                 |
| Stage III                                                |        |         |                                     |
| Year 1                                                   | 35,040 | 10,512  | W50                                 |
| Year 2-5 (annual)                                        | 857    | 257     | W51                                 |
| Stage IV                                                 |        |         |                                     |
| Year 1                                                   | 72,281 | 21,684  | W50                                 |
| Year 2-5 (annual)                                        | 670    | 201     | W51                                 |
| Relapse (annual)                                         | 11,435 | 3,431   | W50                                 |
| Terminal Care                                            | 17,869 | 5,361   | W50                                 |
| <b>Utilities</b>                                         |        |         |                                     |
| No colorectal cancer                                     | 1.0    | 0       | Assumption                          |
| Stage I colorectal cancer                                | 0.74   | 0.22    | W52                                 |
| Stage II colorectal cancer                               | 0.69   | 0.21    | W52                                 |
| Stage III colorectal cancer                              | 0.64   | 0.19    | W52                                 |
| Stage IV colorectal cancer                               | 0.25   | 0.075   | W52                                 |
| Colorectal cancer relapse                                | 0.69   | 0.21    | Assumption                          |
| Death                                                    | 0.00   | 0       | Assumption                          |

### References for model

- W1. Regula J, Rupinski M, Kraszewska E, et al. Colonoscopy in colorectal-cancer screening for detection of advanced neoplasia. *N Engl J Med* 2006;355:1863-72.
- W2. Strul H, Kariv R, Leshno M, et al. The prevalence rate and anatomic location of colorectal adenoma and cancer detected by colonoscopy in average-risk individuals aged 40-80 years. *Am J Gastroenterol* 2006;101:255-62.
- W3. Schoenfeld P, Cash B, Flood A, et al. Colonoscopic screening of average-risk women for colorectal neoplasia. *N Engl J Med* 2005;352:2061-8.
- W4. Lin OS, Kozarek RA, Schembre DB, et al. Screening colonoscopy in very elderly patients: prevalence of neoplasia and estimated impact on life expectancy. *JAMA* 2006;295:2357-65.
- W5. Imperiale TF, Wagner DR, Lin CY, et al. Results of screening colonoscopy among persons 40 to 49 years of age. *N Engl J Med* 2002;346:1781-5.
- W6. Lieberman DA, Weiss DG, Bond JH, et al. Use of colonoscopy to screen asymptomatic adults for colorectal cancer. Veterans Affairs Cooperative Study Group 380. *N Engl J Med* 2000;343:162-8.
- W7. Surveillance, epidemiology, and end results (SEER) program. SEER\*Stat Database: Incidence — SEER 9 Regs Public Use, Nov. 2003 Sub (1973–2004). National Cancer Institute, DCCPS, Surveillance Research Program; 2004. Available: [www.seer.cancer.gov](http://www.seer.cancer.gov) (accessed 2008 Aug. 12).
- W8. Collins JF, Lieberman DA, Durbin TE, et al. Accuracy of screening for fecal occult blood on a single stool sample obtained by digital rectal examination: a comparison with recommended sampling practice. *Ann Intern Med* 2005;142:81-5.
- W9. Lieberman DA, Weiss DG. One-time screening for colorectal cancer with combined fecal occult-blood testing and examination of the distal colon. *N Engl J Med* 2001;345:555-60.
- W10. Imperiale TF, Ransohoff DF, Itzkowitz SH, et al. Fecal DNA versus fecal occult blood for colorectal-cancer screening in an average-risk population. *N Engl J Med* 2004;351:2704-14.
- W11. Greenberg PD, Bertario L, Gnauck R, et al. A prospective multicenter evaluation of new fecal occult blood tests in patients undergoing colonoscopy. *Am J Gastroenterol* 2000;95:1331-8.
- W12. Hoepffner N, Shastri YM, Hanisch E, et al. Comparative evaluation of a new bedside faecal occult blood test in a prospective multicentre study. *Aliment Pharmacol Ther* 2006;23:145-54.
- W13. Wong BC, Wong WM, Cheung KL, et al. A sensitive guaiac faecal occult blood test is less useful than an immunochemical test for colorectal cancer screening in a Chinese population. *Aliment Pharmacol Ther* 2003;18:941-6.
- W14. Shastri YM, Loitsch S, Hoepffner N, et al. Comparison of an established simple office-based immunological FOBT with fecal tumor pyruvate kinase type M2 (M2-PK) for colorectal cancer screening: prospective multicenter study. *Am J Gastroenterol* 2008;103:1496-504.
- W15. Levi Z, Rozen P, Hazazi R, et al. A quantitative immunochemical fecal occult blood test for colorectal neoplasia. *Ann Intern Med* 2007;146:244-55.
- W16. Yoshinaga M, Motomura S, Takeda H, et al. Evaluation of the sensitivity of an immunochemical fecal occult blood test for colorectal neoplasia. *Am J Gastroenterol* 1995;90:1076-9.
- W17. Syngal S, Stoffel E, Chung D, et al. Detection of stool DNA mutations before and after treatment of colorectal neoplasia. *Cancer* 2006;106:277-83.
- W18. Ahlquist DA, Skoletsky JE, Boynton KA, et al. Colorectal cancer screening by detection of altered human DNA in stool: feasibility of a multitarget assay panel. *Gastroenterology* 2000;119:1219-27.
- W19. Tagore KS, Lawson MJ, Yucaitis JA, et al. Sensitivity and specificity of a stool DNA multitarget assay panel for the detection of advanced colorectal neoplasia. *Clin Colorectal Cancer* 2003;3:47-53.
- W20. Rockey DC, Paulson E, Niedzwiecki D, et al. Analysis of air contrast barium enema, computed tomographic colonography, and colonoscopy: prospective comparison. *Lancet* 2005;365:305-11.
- W21. Winawer SJ, Stewart ET, Zauber AG, et al. A comparison of colonoscopy and double-contrast barium enema for surveillance after polypectomy. National Polyp Study Work Group. *N Engl J Med* 2000;342:1766-72.
- W22. Irvine EJ, O'Connor J, Frost RA, et al. Prospective comparison of double contrast barium enema plus flexible sigmoidoscopy v colonoscopy in rectal bleeding: barium enema v. colonoscopy in rectal bleeding. *Gut* 1988;29:1188-93.
- W23. Cotton PB, Durkalski VL, Pineau BC, et al. Computed tomographic colonography (virtual colonoscopy): a multicenter comparison with standard colonoscopy for detection of colorectal neoplasia. *JAMA* 2004;291:1713-9.

- W24. Pickhardt PJ, Choi JR, Hwang I, et al. Computed tomographic virtual colonoscopy to screen for colorectal neoplasia in asymptomatic adults. *N Engl J Med* 2003;349:2191-200.
- W25. Rex DK, Cutler CS, Lemmel GT, et al. Colonoscopic miss rates of adenomas determined by back-to-back colonoscopies. *Gastroenterology* 1997;112:24-8.
- W26. Ginnerup Pedersen B, Christiansen TE, Bjerregaard NC, et al. Colonoscopy and multidetector-array computed-tomographic colonography: detection rates and feasibility. *Endoscopy* 2003;35:736-42.
- W27. Hixson LJ, Fennerty MB, Sampliner RE, et al. Prospective blinded trial of the colonoscopic miss-rate of large colorectal polyps. *Gastrointest Endosc* 1991;37:125-7.
- W28. Taylor SA, Halligan S, Saunders BP, et al. Use of multidetector-row CT colonography for detection of colorectal neoplasia in patients referred via the Department of Health "2-Week-wait" initiative. *Clin Radiol* 2003;58:855-61.
- W29. Matsushita M, Hajiro K, Okazaki K, et al. Efficacy of total colonoscopy with a transparent cap in comparison with colonoscopy without the cap. *Endoscopy* 1998;30:444-7.
- W30. Rex DK, Alikhan M, Cummings O, et al. Accuracy of pathologic interpretation of colorectal polyps by general pathologists in community practice. *Gastrointest Endosc* 1999;50:468-74.
- W31. Pineau BC, Paskett ED, Chen GJ, et al. Virtual colonoscopy using oral contrast compared with colonoscopy for the detection of patients with colorectal polyps. *Gastroenterology* 2003;125:304-10.
- W32. Hardcastle JD, Chamberlain JO, Robinson MH, et al. Randomised controlled trial of faecal-occult-blood screening for colorectal cancer. *Lancet* 1996;348:1472-7.
- W33. Kronborg O, Fenger C, Olsen J, et al. Randomised study of screening for colorectal cancer with faecal-occult-blood test. *Lancet* 1996;348:1467-71.
- W34. Mandel JS, Bond JH, Church TR, et al. Reducing mortality from colorectal cancer by screening for fecal occult blood. Minnesota Colon Cancer Control Study. *N Engl J Med* 1993;328:1365-71.
- W35. Selby JV, Friedman GD, Quesenberry CP Jr, et al. A case-control study of screening sigmoidoscopy and mortality from colorectal cancer. *N Engl J Med* 1992;326:653-7.
- W36. Jorgensen OD, Kronborg O, Fenger C. A randomised study of screening for colorectal cancer using faecal occult blood testing: results after 13 years and seven biennial screening rounds. *Gut* 2002;50:29-32.
- W37. Mandel JS, Church TR, Bond JH, et al. The effect of fecal occult-blood screening on the incidence of colorectal cancer. *N Engl J Med* 2000;343:1603-7.
- W38. Levin TR, Conell C, Shapiro JA, et al. Complications of screening flexible sigmoidoscopy. *Gastroenterology* 2002;123:1786-92.
- W39. Levin TR, Zhao W, Conell C, et al. Complications of colonoscopy in an integrated health care delivery system. *Ann Intern Med* 2006;145:880-6.
- W40. de Feiter PW, Soeters PB, Dejong CH. Rectal perforations after barium enema: a review. *Dis Colon Rectum* 2006;49:261-71.
- W41. Sosna J, Blachar A, Amitai M, et al. Colonic perforation at CT colonography: assessment of risk in a multicenter large cohort. *Radiology* 2006;239:457-63.
- W42. Weiser MR, Landmann RG, Kattan MW, et al. Individualized prediction of colon cancer recurrence using a nomogram. *J Clin Oncol* 2008;26:380-5.
- W43. de Gramont A, Boni C, Navarro M, et al. Oxaliplatin/5FU/LV in adjuvant colon cancer: updated efficacy results of the MOSAIC trial including survival, with a median follow-up of six years. *J Clin Oncol* 2007;25(18S):AB4007.
- W44. Ontario health insurance schedule of benefits and fees. Toronto (ON): Ontario Ministry of Health; 2007.
- W45. Flanagan WM, Le Petit C, Berthelot JM, et al. Potential impact of population-based colorectal cancer screening in Canada. *Chronic Dis Can* 2003;24:81-8.
- W46. Parekh M, Fendrick AM, Ladabaum U. As tests evolve and costs of cancer care rise: reappraising stool-based screening for colorectal neoplasia. *Aliment Pharmacol Ther* 2008;27:697-712.
- W47. McGrath JS, Ponich TP, Gregor JC. Screening for colorectal cancer: the cost to find an advanced adenoma. *Am J Gastroenterol* 2002;97:2902-7.
- W48. Sambrook JC, Chui W, Wang H, et al. Colonoscopy and flexible sigmoidoscopy: A microcosting study evaluating diagnostic procedural costs in an outpatient endoscopy clinic. *Can J Gastroenterol* 2006;20(Suppl A):AB167.

- W49. Heitman SJ, Manns BJ, Hilsden RJ, et al. Cost-effectiveness of computerized tomographic colonography versus colonoscopy for colorectal cancer screening. *CMAJ* 2005;173:877-81.
- W50. Maroun J, Ng E, Berthelot JM, et al. Lifetime costs of colon and rectal cancer management in Canada. *Chronic Dis Can* 2003;24:91-101.
- W51. Figueredo A, Rumble RB, Maroun J, et al. Follow-up of patients with curatively resected colorectal cancer: a practice guideline. *BMC Cancer* 2003;3:26.
- W52. Ness RM, Holmes AM, Klein R, et al. Utility valuations for outcome states of colorectal cancer. *Am J Gastroenterol* 1999;94:1650-7.
